# Supplementary material for: Photooxidation of cyclohexene in the presence of SO 2 : SOA yield and chemical composition
Source: Copernicus journal article supplement (doi:10.5194/acp-17-13329-2017), 2017-11-09
Supplement: Supplementary file 1 [file acp-17-13329-2017-supplement.pdf]

Supplement of Atmos. Chem. Phys., 17, 13329–13343, 2017  
<https://doi.org/10.5194/acp-17-13329-2017-supplement>  
© Author(s) 2017. This work is distributed under  
the Creative Commons Attribution 3.0 License.

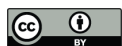

*Supplement of*

## **Photooxidation of cyclohexene in the presence of SO<sub>2</sub>: SOA yield and chemical composition**

**Shijie Liu et al.**

*Correspondence to:* Lin Du ([lindu@sdu.edu.cn](mailto:lindu@sdu.edu.cn)) and Yongfu Xu ([xyf@mail.iap.ac.cn](mailto:xyf@mail.iap.ac.cn))

The copyright of individual parts of the supplement might differ from the CC BY 3.0 License.

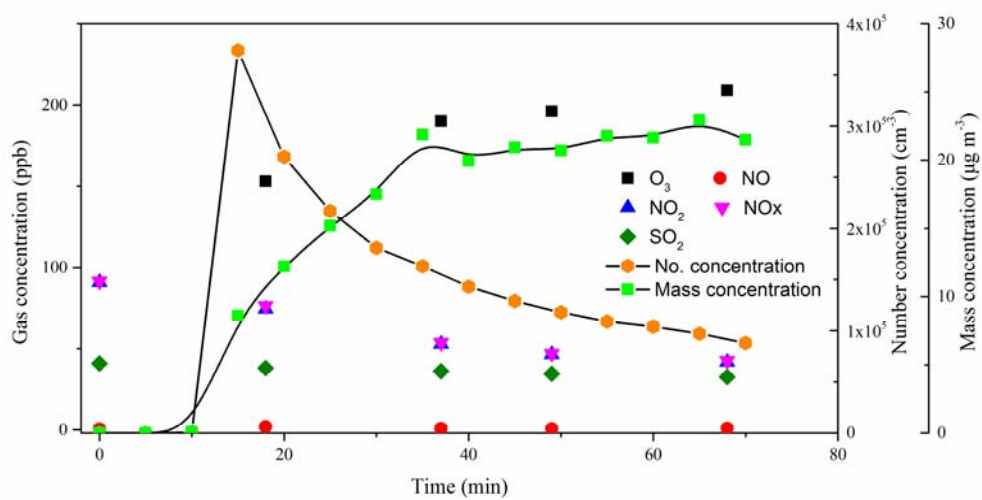

Figure S1: Typical profiles of the gas and particle phases (SOA) in the experiments.

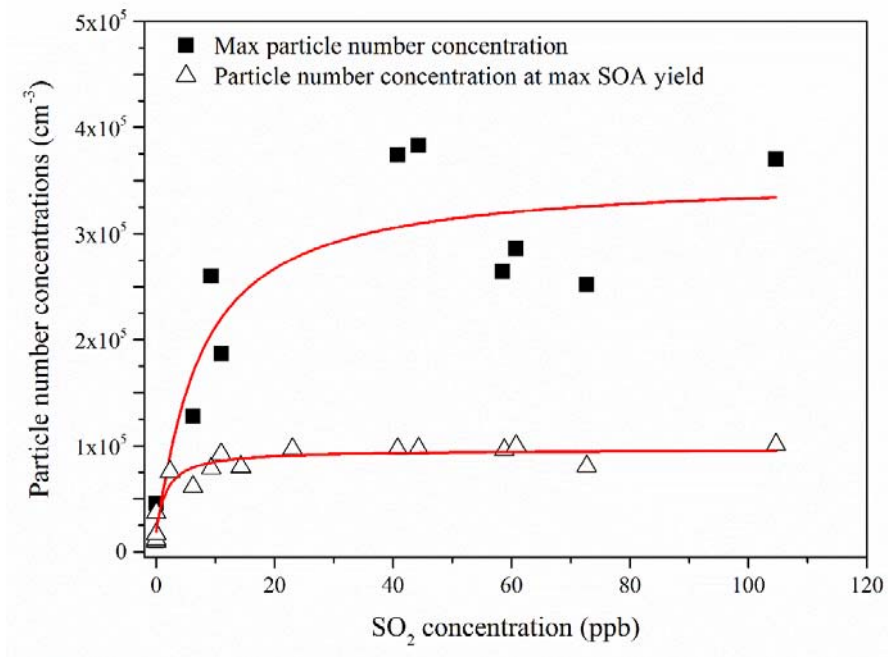

Figure S2: The maximum particle number concentrations and the particle number concentrations at the maximum SOA yield particle number concentrations for cyclohexene/NO<sub>x</sub>/SO<sub>2</sub> system at different initial SO<sub>2</sub> concentrations.

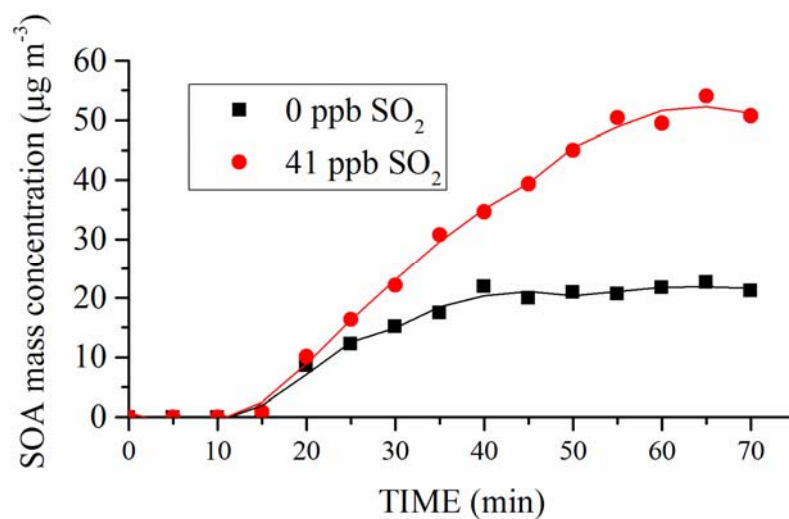

Figure S3: Changes of SOA mass concentrations with time for two different initial  $\text{SO}_2$  concentration, 0 and 41 ppb.

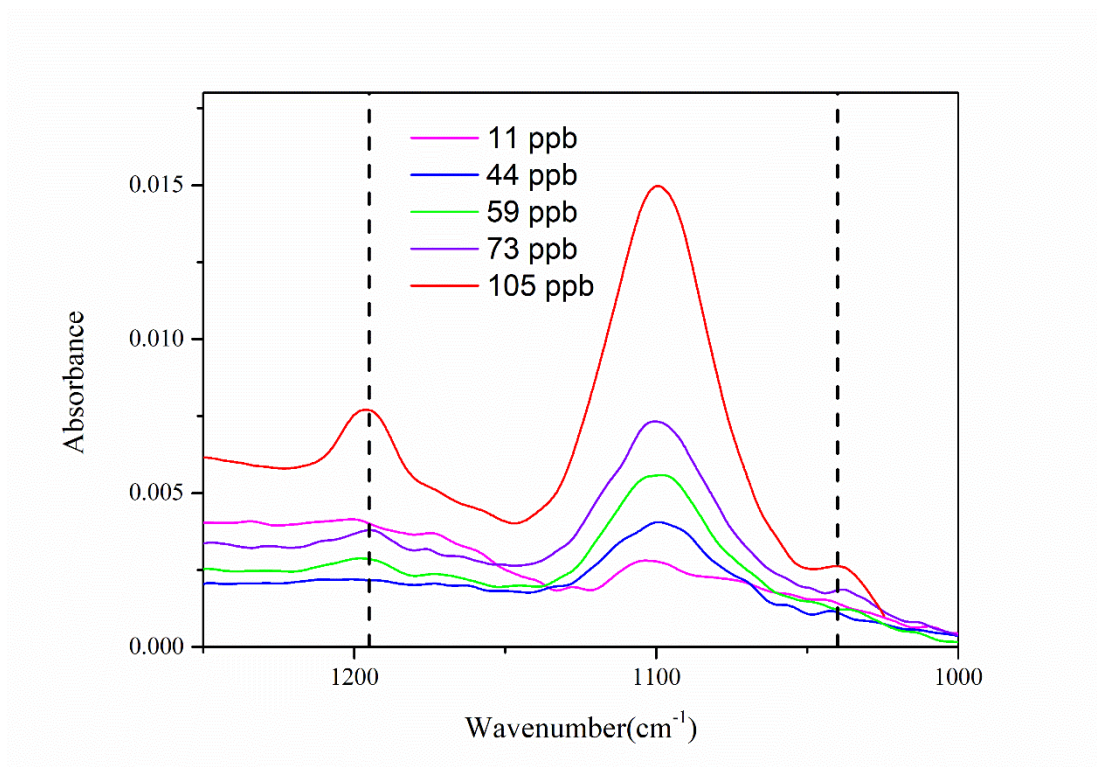

Figure S4: The change of the two peaks at 1195 and 1040 cm<sup>-1</sup> at different initial SO<sub>2</sub> concentrations.

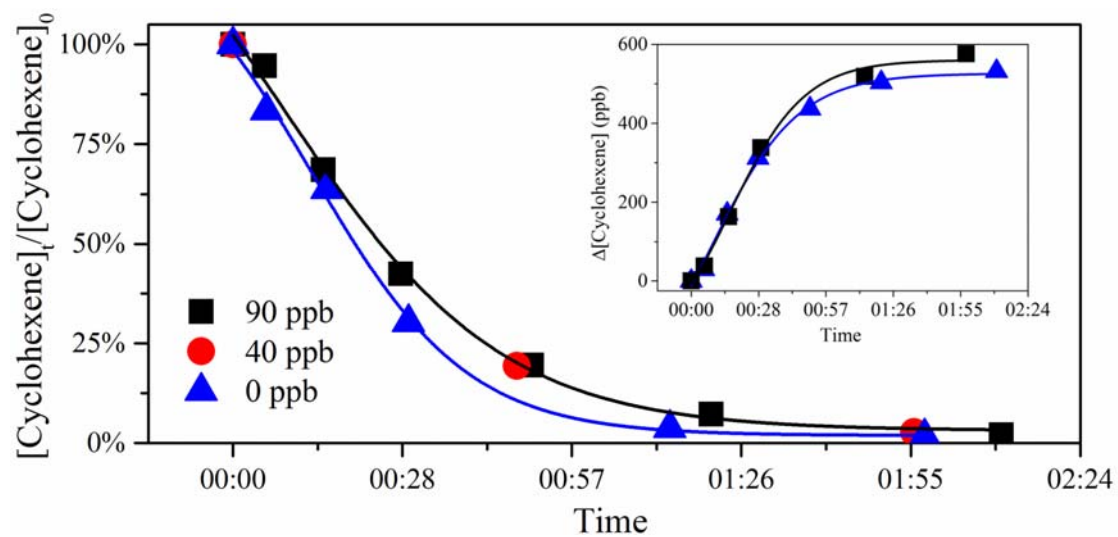

Figure S5: Change of cyclohexene concentration with time at different initial SO<sub>2</sub> concentrations. The inner plot shows the amount of consumed cyclohexene with time.

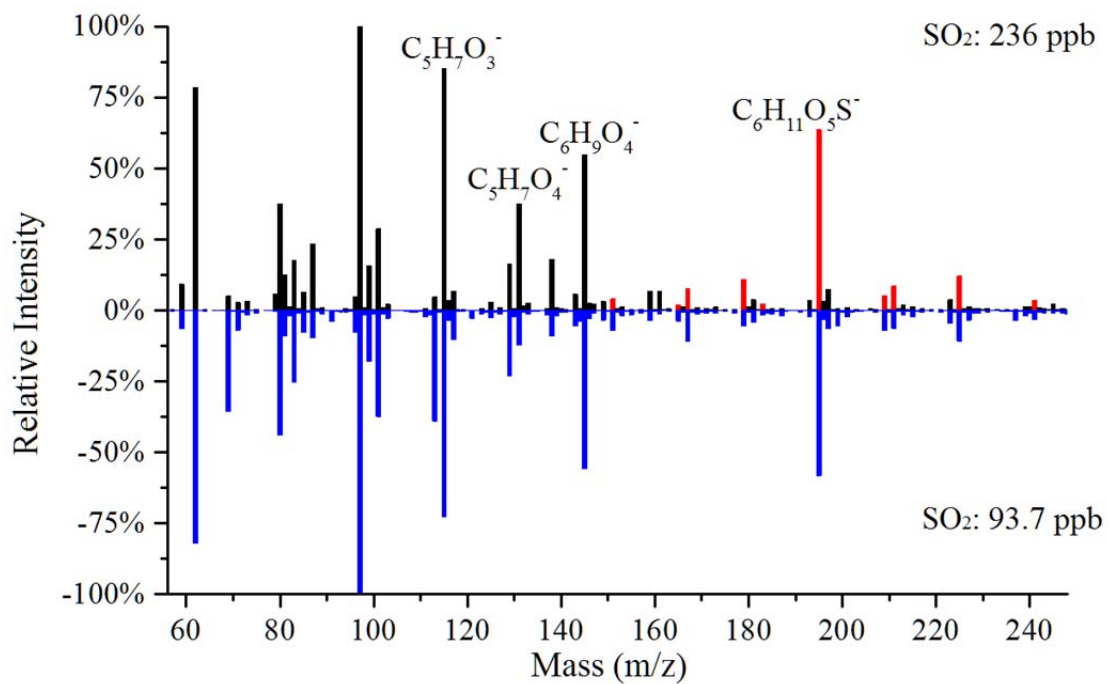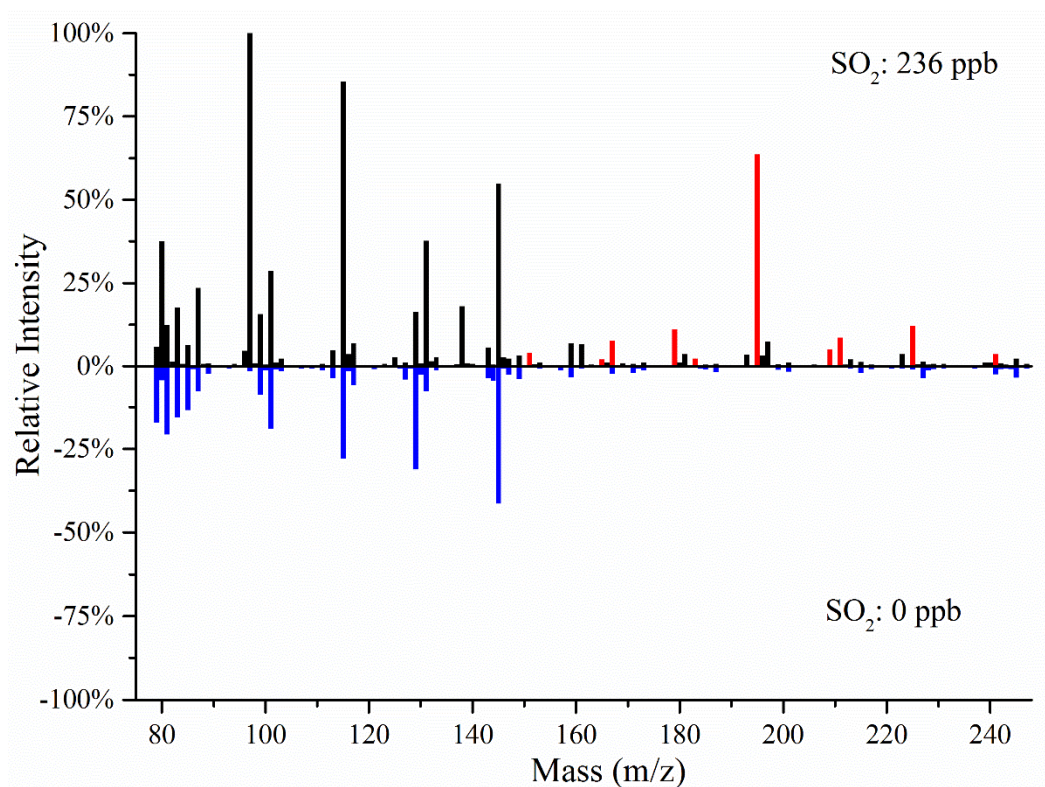

Figure S6: Comparison of SOA Exactive-Orbitrap MS spectra with different initial SO<sub>2</sub> concentrations.
